# Supplementary material for: Synthesis, structure, electrochemical, DNA interaction and antimicrobial studies of fluorinated trans-dicationic pyridinium porphyrins
Source: Royal Society of Chemistry journal article supplement (doi:10.1039/c6ra09148b), 2016-01-01
Supplement: c6ra09148b1.pdf [file c6ra09148b1.pdf]

*Electronic Supplementary Information*  
*for*

**Synthesis, Structure, Electrochemical, DNA Interaction and Antimicrobial Studies of Fluorinated *Trans*-Dicationic Pyridinium Porphyrins**

**Jagadeesan Ramesh, Subramaniam Sujatha\* and Chellaiah Arunkumar\***

*Bioinorganic Materials Research Laboratory, Department of Chemistry, National Institute of Technology Calicut, Kozhikode, Kerala, India - 673 601.*

**Contents**

**Figure S1.** Absorption spectra of pH 7.2 buffer solutions of (a) **4b**, (b) **4c**, (c) **5a**, (d) **5b**, (e) **6a**, (f) **6b** and (g) **6c** in the presence of increasing amounts of CT DNA. [porphyrin] = 3  $\mu$ M, [DNA] = 0-3  $\mu$ M. Inset: Plot of [DNA] / ( $\Delta\epsilon$ ) vs. [DNA].

**Figure S2.** Fluorescence emission spectra of porphyrins, (a) **4c**, (b) **5a**, (c) **5c** and (d) **6c** with increasing concentration of CT DNA. [porphyrin] = 3  $\mu$ M, [DNA] = 0-1  $\mu$ M.  $\lambda_{ex}$  = 480 nm.

**Figure S3.** Emission spectra of EB bound to DNA in the presence of porphyrins, (a) **4b**, (b) **4c**, (c) **5b**, (d) **5c**, (e) **6a**, (f) **6b** and (g) **6c**. [DNA] = 12  $\mu$ M, [EB] = 7.5  $\mu$ M, [porphyrin] = 0-12  $\mu$ M. Inset: Fluorescence quenching curve of EB bound DNA by the porphyrins.

**Figure S4.** Molecular crystal packing of **3c** forming through N $\cdots$ H, C $\cdots$ H, C $\cdots$ N and N $\cdots$ N interactions, (a) viewed down 'a' axis and (b) viewed down 'ab' plane.

**Figure S5.** ESI mass spectrum of porphyrin ligand, **3a**.

**Figure S6.** ESI mass spectrum of porphyrin ligand, **6a**.

**Figure S7.** Percentage contribution of non-covalent interactions in porphyrins, **1a**, **2a**, **3c**, **6a** and **6c** on the basis of HSs.

**Figure S8.** *Invitro* antimicrobial studies of **6c** towards five pathogens.

**Figure S9.** Effect of *trans*-4-pyridyl and *trans*-dicationic 4-pyridinium porphyrins on Vero cells.

**Table S1.** Singlet oxygen quantum yield and luminescence lifetime of compounds **4a-c**, **5a-c** and **6a-c**. (Lifetime measured at 640 nm for free ligands; 640 nm for copper(II) porphyrins and 600 nm for zinc(II) porphyrins)

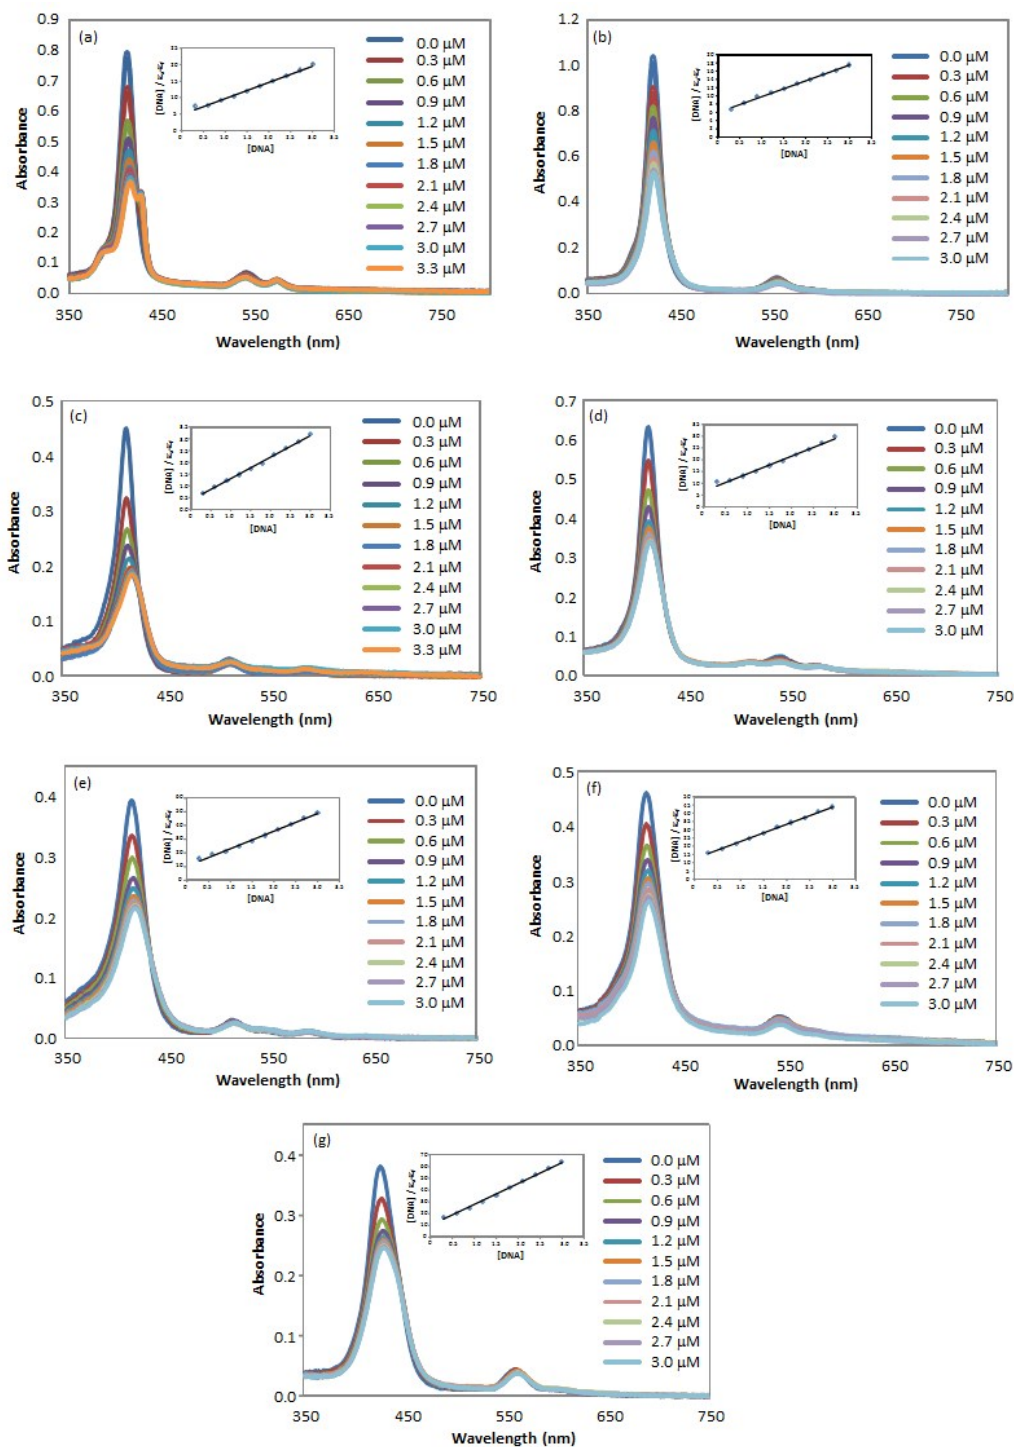

**Figure S1.** Absorption spectra of pH 7.2 buffer solutions of (a) **4b**, (b) **4c**, (c) **5a**, (d) **5b**, (e) **6a**, (f) **6b** and (g) **6c** in the presence of increasing amounts of CT DNA. [porphyrin] = 3  $\mu\text{M}$ , [DNA] = 0 – 3  $\mu\text{M}$ . Inset: Plot of  $[\text{DNA}] / (\Delta\epsilon)$  vs.  $[\text{DNA}]$ .

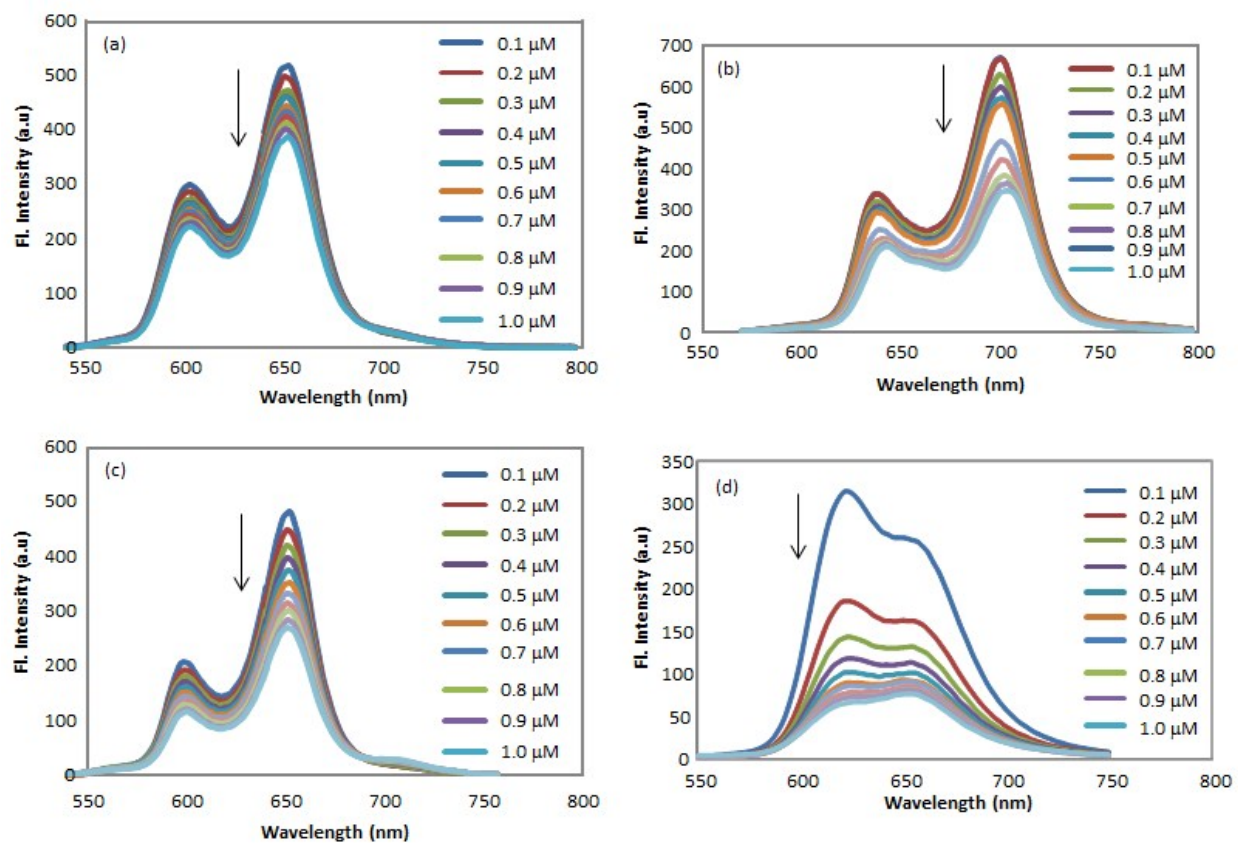

**Figure S2.** Fluorescence emission spectra of porphyrins, (a) **4c**, (b) **5a**, (c) **5c** and (d) **6c** with increasing concentration of CT DNA. [porphyrin] = 3  $\mu\text{M}$ , [DNA] = 0-1  $\mu\text{M}$ .  $\lambda_{\text{ex}}$  = 480 nm.

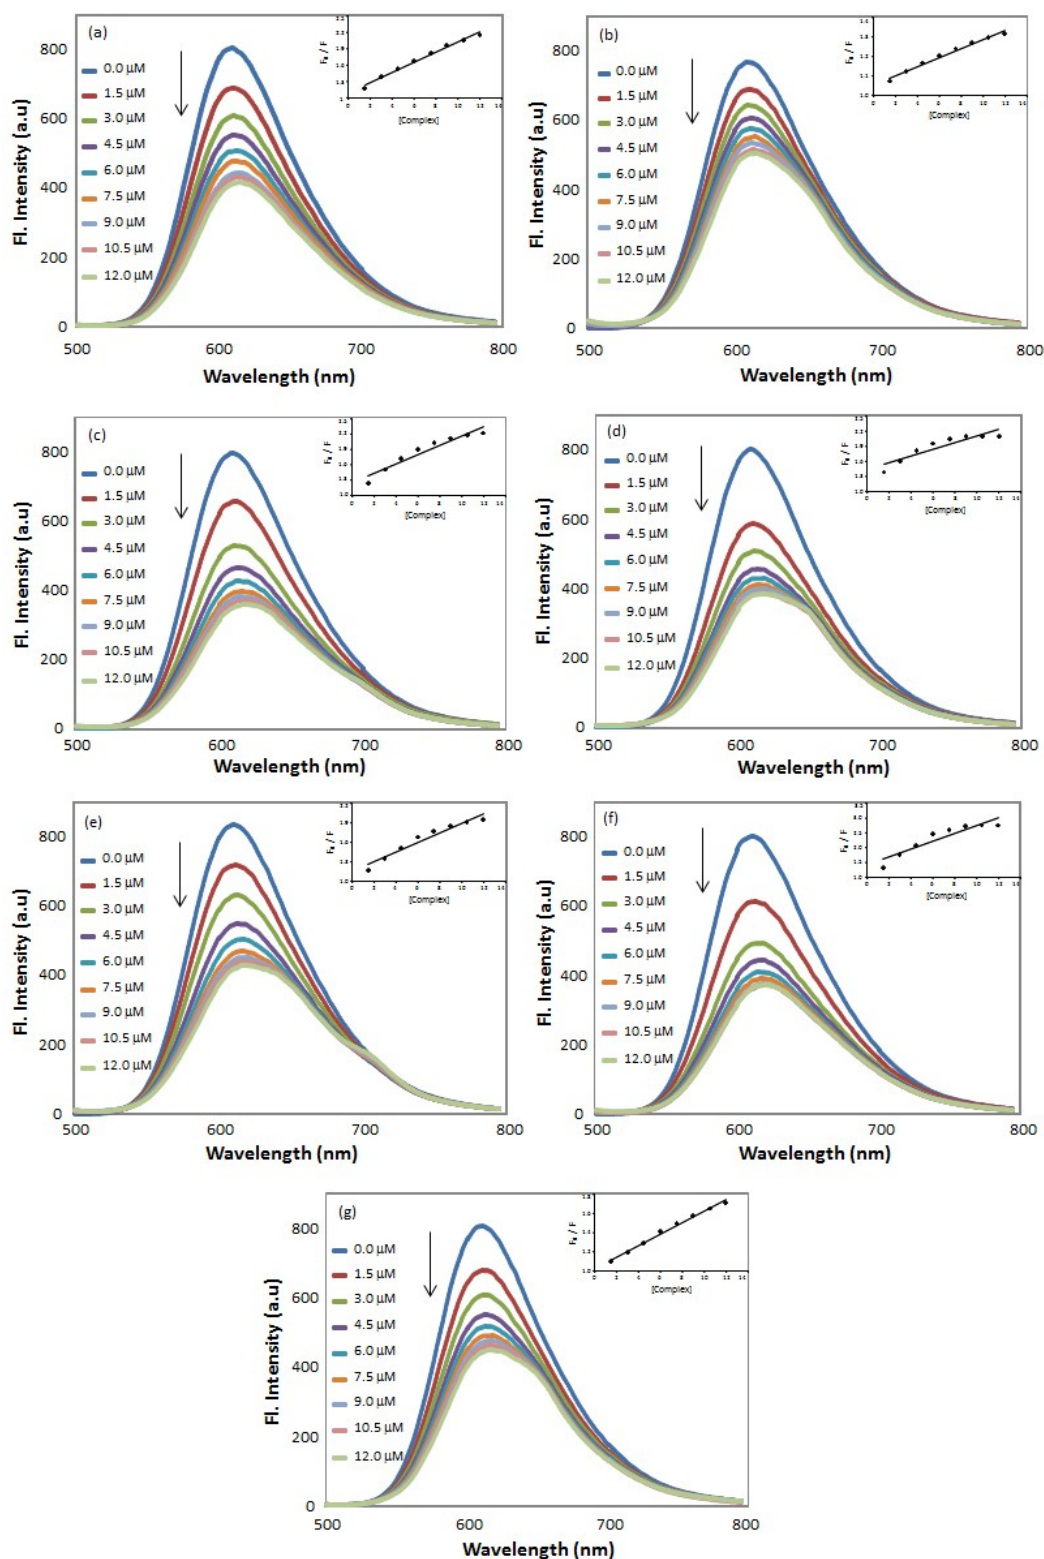

**Figure S3.** Emission spectra of EB bound to DNA in the presence of porphyrins, (a) **4b**, (b) **4c**, (c) **5b**, (d) **5c**, (e) **6a**, (f) **6b** and (g) **6c**. [DNA] = 12  $\mu\text{M}$ , [EB] = 7.5  $\mu\text{M}$ , [porphyrin] = 0-12  $\mu\text{M}$ . Inset: Fluorescence quenching curve of EB bound DNA by the porphyrins.

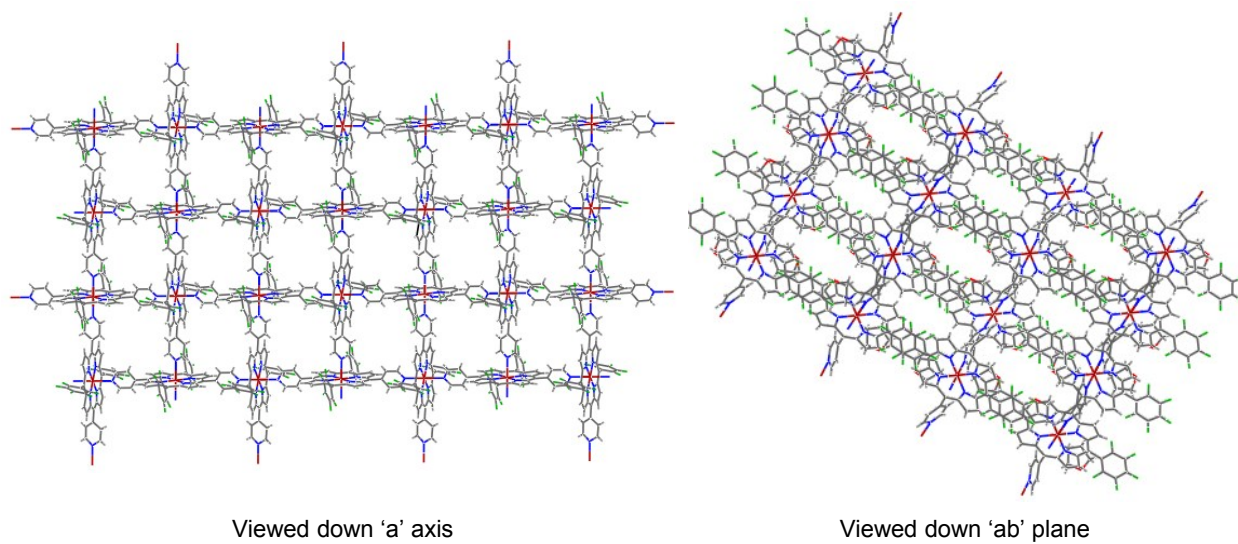

**Figure S4.** Molecular crystal packing of **3c** forming through N $\cdots$ H, C $\cdots$ H, C $\cdots$ N and N $\cdots$ N interactions, (a) viewed down 'a' axis and (b) viewed down 'ab' plane.

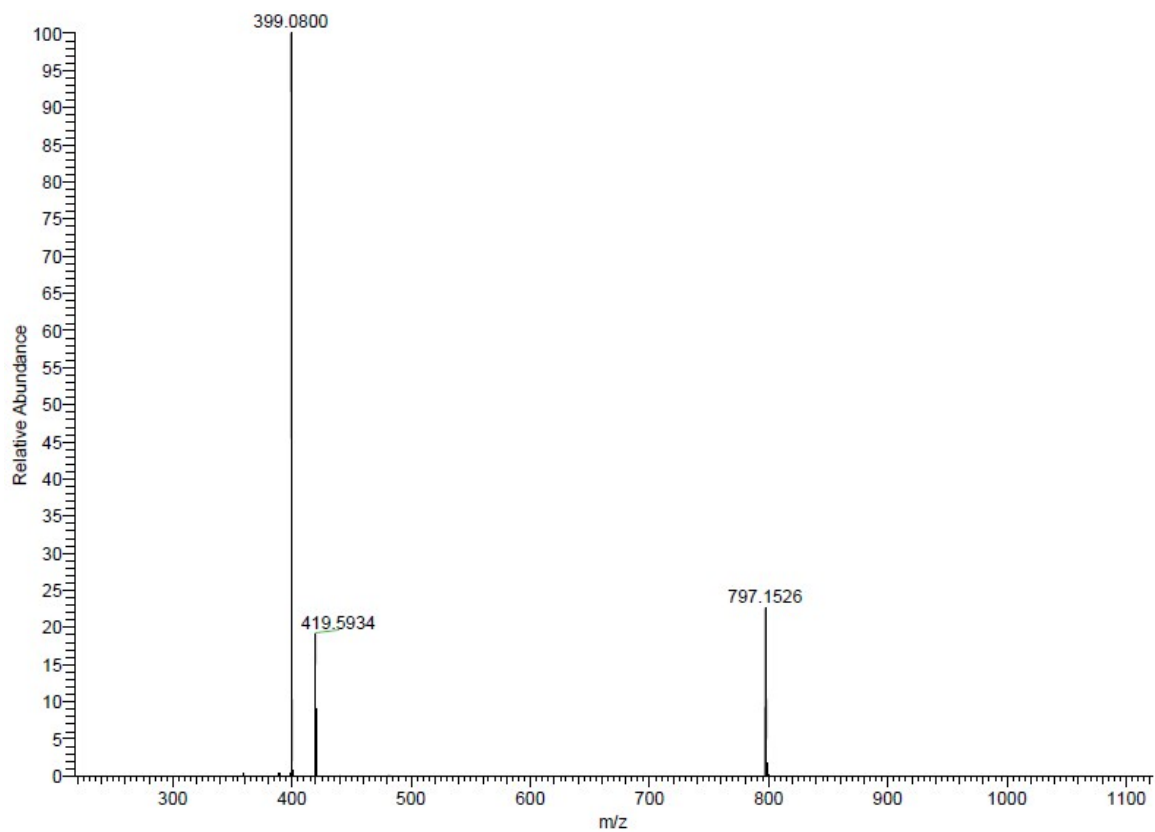

**Figure S5.** ESI mass spectrum of porphyrin ligand, **3a**.

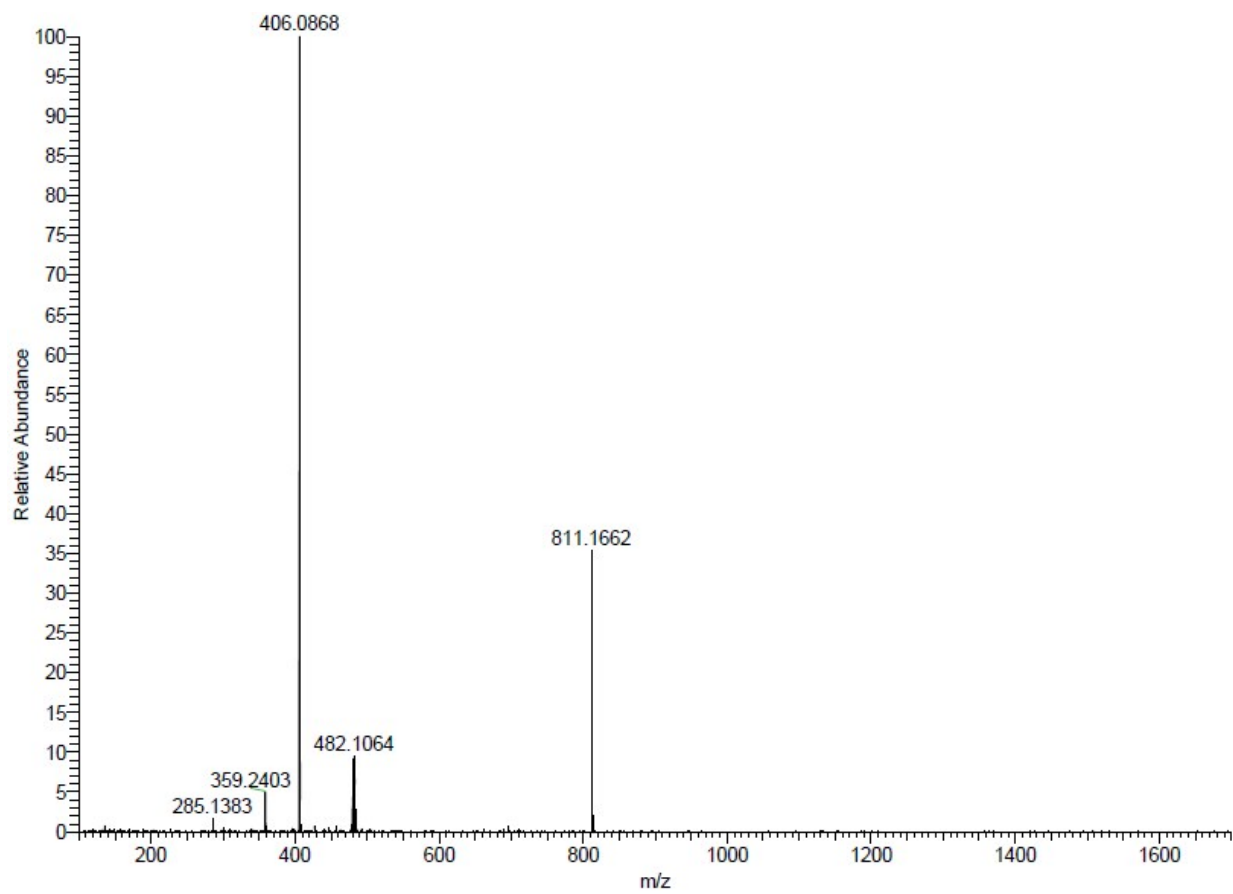

**Figure S6.** ESI mass spectrum of porphyrin ligand, **6a**.

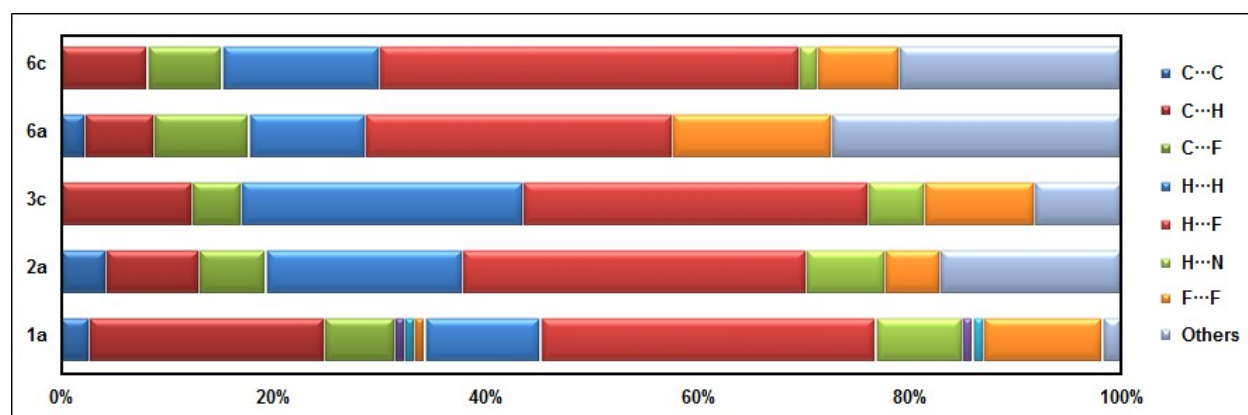

**Figure S7.** Percentage contribution of non-covalent interactions in porphyrins, **1a**, **2a**, **3c**, **6a** and **6c** on the basis of HSs.

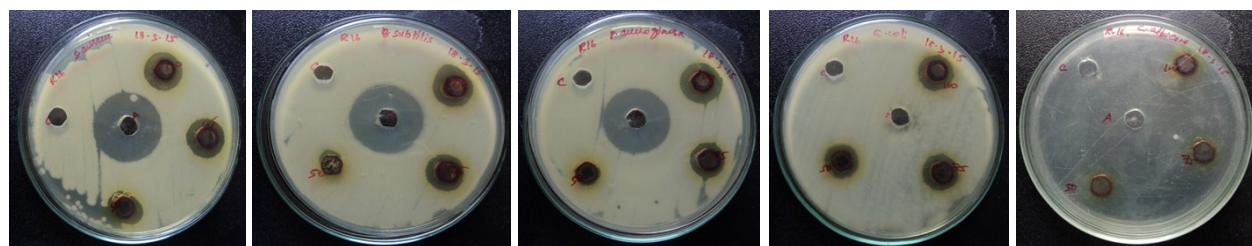

*C. albicans*

*B. subtilis*

*P. aeruginosa*

*S. aureus*

*E. coli*

**Figure S8.** *In vitro* antimicrobial studies of **6c** towards five pathogens.

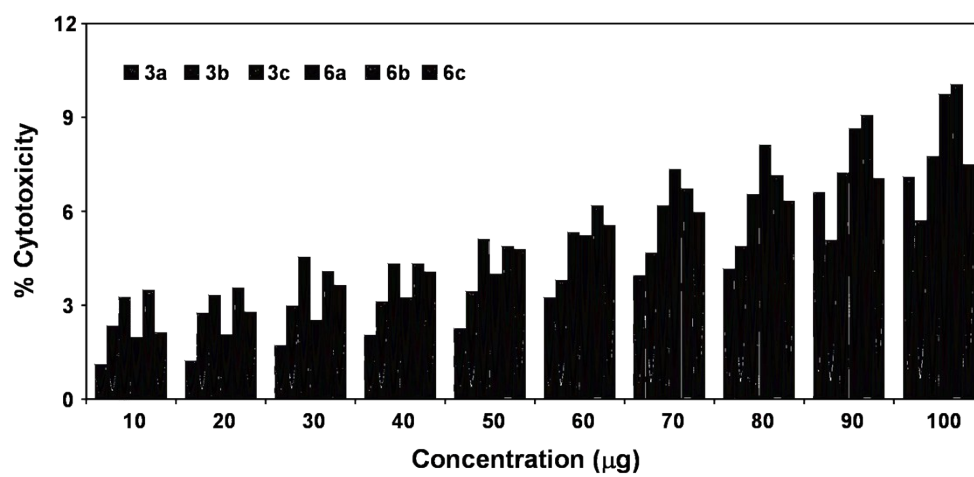

**Figure S9.** Effect of *trans*-4-pyridyl and *trans*-dicationic 4-pyridinium porphyrins on Vero cells

**Table S1.** Singlet oxygen quantum yield and luminescence lifetime of compounds **4a-c**, **5a-c** and **6a-c**. (Lifetime measured at 640 nm for free ligands; 640 nm for copper(II) porphyrins and 600 nm for zinc(II) porphyrins)

| <b>Porphyrin</b>                              | <b>4a</b> | <b>4b</b> | <b>4c</b> | <b>5a</b> | <b>5b</b> | <b>5c</b> | <b>6a</b> | <b>6b</b> | <b>6c</b> |
|-----------------------------------------------|-----------|-----------|-----------|-----------|-----------|-----------|-----------|-----------|-----------|
| Singlet Oxygen Quantum Yield, $\phi_{\Delta}$ | 0.85      | 0.13      | 0.90      | 0.68      | 0.14      | 0.93      | 0.90      | 0.13      | 0.85      |
| Life time $\tau$ (ns)                         | 13.26     | 6.07      | 1.76      | 10.27     | 12.17     | 7.18      | 11.44     | 9.26      | 1.47      |
